# Supplementary material for: Combined DiI and Antibody Labeling Reveals Complex Dysgenesis of Hippocampal Dendritic Spines in a Mouse Model of Fragile X Syndrome
Source: MDPI journal article supplement (doi:10.3390/biomedicines10112692), 2022-10-25
Supplement: s1 [file s1]

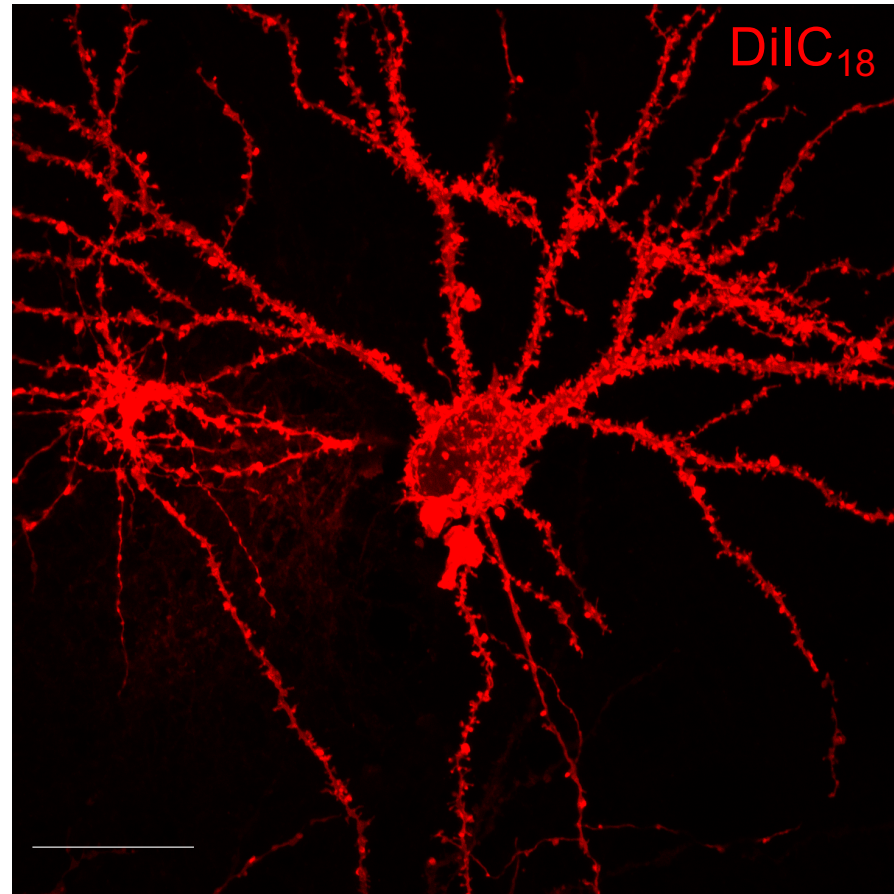

**Figure S1.** Representative confocal image of neurons in WT mouse hippocampus stained with DiIC<sub>18</sub>; scale bar 25  $\mu$ m.

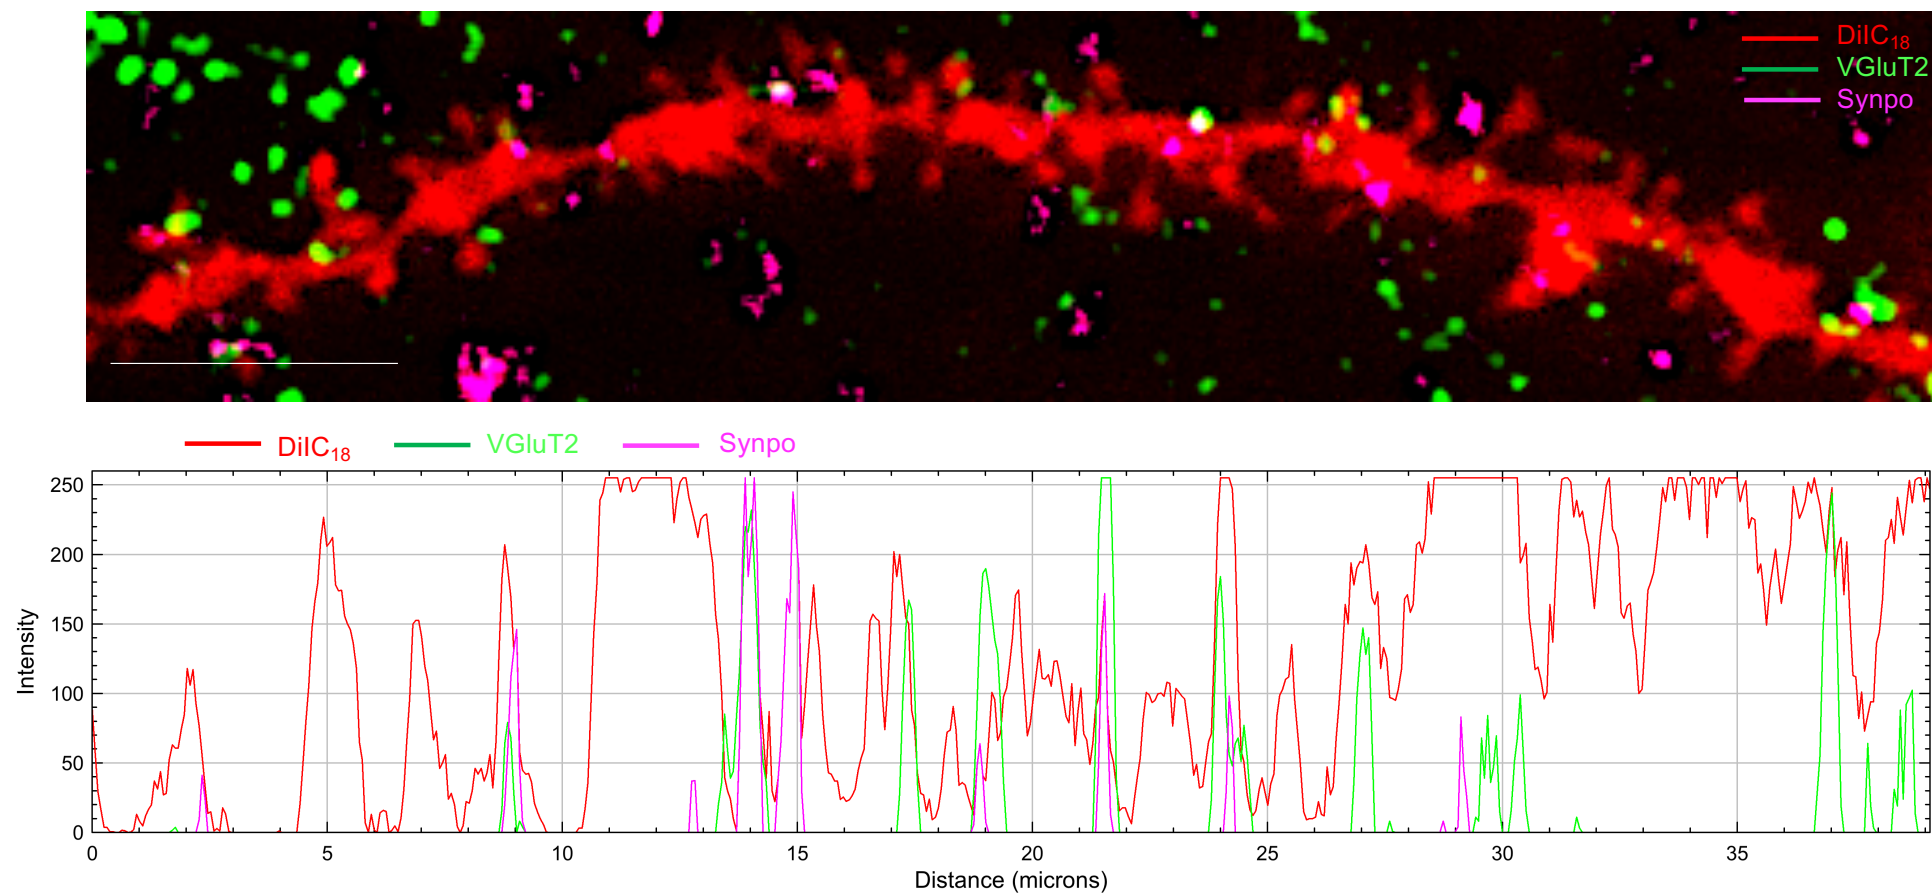

**Figure S2.** Representative line scan illustrating signal intensity for DiIC<sub>18</sub> (red), VGluT2 (green), and Synpo (Magenta) in function of distance. Scale bar, 5 $\mu$ m.

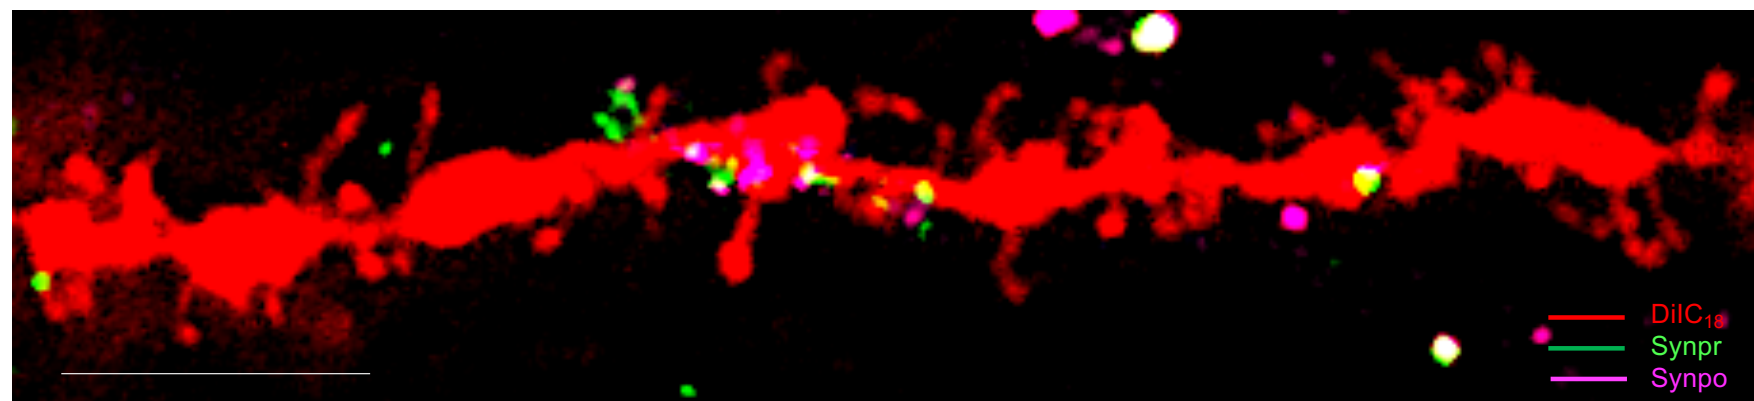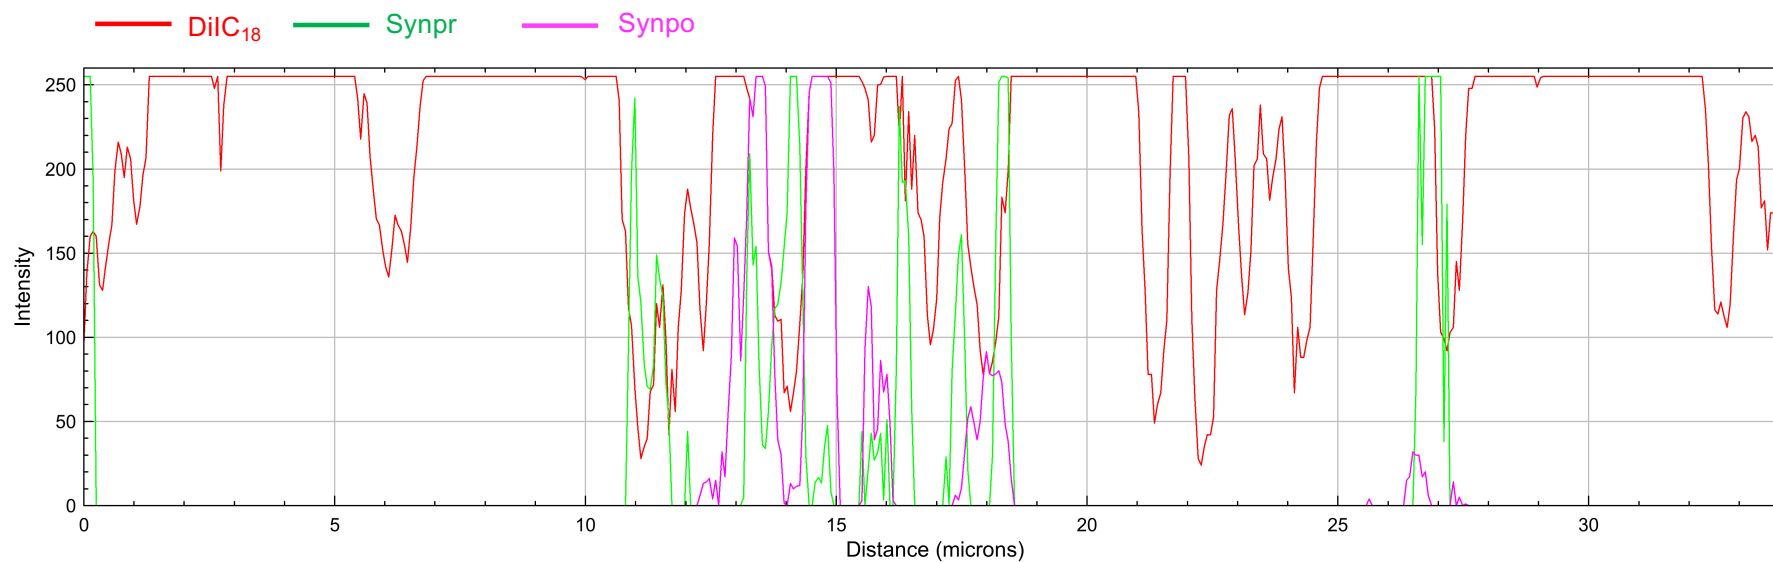

**Figure S3.** Representative line scan illustrating signal intensity for DiIC<sub>18</sub> (red), Synpr (green), and Synpo (Magenta) in function of distance. Scale bar, 5 $\mu$ m.

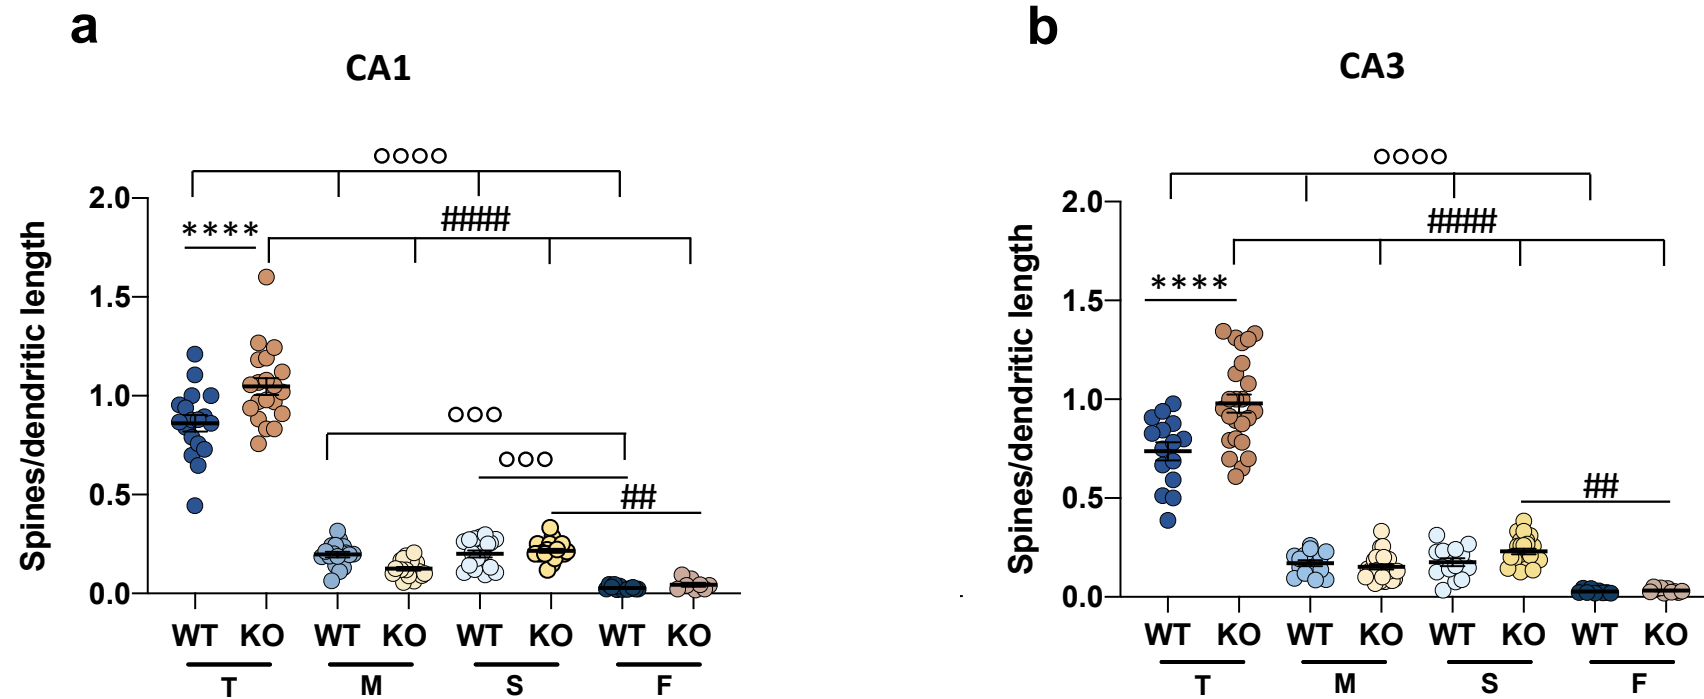

**Figure S4. DiIC<sub>18</sub> staining reveals dysgenesis of hippocampal spines in juvenile Fmr1 KO mice.** (a) Quantification of thin (T), mushroom (M), stubby (S), and filopodia (F) spines per dendritic length ( $\mu\text{m}$ ) in CA1 of WT and Fmr1 KO mice. Differences were evaluated by two-way ANOVA followed by Tukey's post-hoc multiple comparisons test \*\*\*\*  $p < 0.0001$  KO vs WT, oooo  $p < 0.0001$  WT vs WT, ooo  $p \leq 0.0007$  WT vs WT, ###  $p < 0.0001$  KO vs KO, ##  $p = 0.0044$  KO vs KO. A two-factor ANOVA demonstrated a significant effect of spine type ( $p < 0.0001$ ) but a non-significant effect of genotype ( $p = 0.057$ ), and the interaction of genotype by spine's type is significant ( $p < 0.0001$ ). (b) Quantification of spines per dendritic length ( $\mu\text{m}$ ) in CA3 of WT and Fmr1 KO mice. Differences were evaluated by two-way ANOVA followed by Tukey's post-hoc multiple comparisons test \*\*\*\*  $p < 0.0001$ , oooo  $p < 0.0001$  WT vs WT, ##  $p < 0.0011$  KO vs KO. A two-factor ANOVA demonstrated a significant effect of genotype ( $p = 0.0022$ ) and spine's type ( $p < 0.0001$ ), and the interaction of genotype by spine's type is significant ( $p < 0.0001$ ).
